# Supplementary material
Source: HighWire-hosted journal article supplement (https://bjsm.bmj.com/content/51/14/1065)
Supplement: inline-supplementary-material-3 [file inline-supplementary-material-3.pdf]

**Supplementary Table S1** Description of the exercise interventions

| <b>Trial</b>                                                 | <b>Participants*</b>                                                                                         | <b>Intervention</b>                                                                                                                                                                                                                                                                                                                                                                                                                                                                                                                                                                                                                                                                                                                                                                                     |
|--------------------------------------------------------------|--------------------------------------------------------------------------------------------------------------|---------------------------------------------------------------------------------------------------------------------------------------------------------------------------------------------------------------------------------------------------------------------------------------------------------------------------------------------------------------------------------------------------------------------------------------------------------------------------------------------------------------------------------------------------------------------------------------------------------------------------------------------------------------------------------------------------------------------------------------------------------------------------------------------------------|
| <b>Alemo-Munters et al.<sup>52</sup><br/>2013<br/>Sweden</b> | 21 patients<br>PM and DM,<br>mean age 62<br>(EG) and 60<br>(CG). 76%<br>women.                               | <b>Exercise modality:</b> Cardiorespiratory<br><b>Exercise period:</b> 12 weeks<br><b>Duration/frequency:</b> 1 hour 3/week.<br><b>Description:</b> <u>Cardiorespiratory:</u> Cycling for 30 minutes. <b>Intensity:</b> 70% of VO <sub>2</sub> max. 20 min of muscular endurance exercise of knee extensors at 30-40% of 1RM.<br><b>Guidance:</b> Supervised twice a week and one session at home.<br><b>Adherence:</b> One patient was not able to perform the exercise program and was excluded.<br><b>Control group:</b> Instructed not to change their exercise or physical activity level.                                                                                                                                                                                                         |
| <b>Alexanderson et al.<sup>26</sup><br/>2014<br/>Sweden</b>  | 13 patients<br>with recent-<br>onset<br>PM/DM,<br>median age<br>60 years.<br>77% women.                      | <b>Exercise modality:</b> Cardiorespiratory and strength exercises<br><b>Exercise period:</b> 24 weeks<br><b>Duration/Frequency:</b> 5 days/week (duration not given)<br><b>Description:</b> <u>Strength:</u> Resistive exercise program of 7 exercises. 5 days/week for 12 weeks, 2/week from week 12-24. <b>Intensity:</b> Prescribed individually. <b>Reps:</b> 10 reps<br><u>Cardiorespiratory:</u> 15 minute walk. <b>Intensity:</b> 50-70% of max HR.<br><b>Guidance:</b> Weekly telephone support from a PT. Exercise at a gym was an alternative.<br><b>Adherence:</b> EG performed 79% of the resistive exercise and 81% of the walks.<br><b>Control group:</b> 15 minutes ROM exercise program 5 days/week, only activities of daily living and ordinary walks without any telephone support. |
| <b>Baillet et al.<sup>37</sup><br/>2009<br/>France</b>       | 48 RA<br>patients,<br>mean age 52<br>(EG) and 56<br>(CG) years.<br>84% women<br>(EG) and 78%<br>female (CG). | <b>Exercise modality:</b> Cardiorespiratory and strength exercises<br><b>Exercise period:</b> 4 weeks<br><b>Duration/frequency:</b> 5 hours a day.<br><b>Description:</b> Exercise program consistent with the ACSM. Cycling, running or resisting pulley cord 45/min/day. During cycling HR=60-80% of max. <b>Intensity:</b> Resistance and intensity of exercise were designed after individual evaluation of each patient.<br>Hydrotherapy pool (60 min/day).<br><b>Guidance:</b> All exercise sessions was supervised                                                                                                                                                                                                                                                                               |

|                                                                                         |                                                                                    |                                                                                                                                                                                                                                                                                                                                                                                                                                                                                                                                                                                                                                                                                           |
|-----------------------------------------------------------------------------------------|------------------------------------------------------------------------------------|-------------------------------------------------------------------------------------------------------------------------------------------------------------------------------------------------------------------------------------------------------------------------------------------------------------------------------------------------------------------------------------------------------------------------------------------------------------------------------------------------------------------------------------------------------------------------------------------------------------------------------------------------------------------------------------------|
|                                                                                         |                                                                                    | <p><b>Adherence:</b> Not reported</p> <p><b>Control group:</b> 3 days intervention. Day 1 with hydrotherapy (45 min), day 2 with relaxation exercises (45 min). Flexibility exercises (45 min).</p>                                                                                                                                                                                                                                                                                                                                                                                                                                                                                       |
| <p><b>Baslund et al.</b><sup>36</sup><br/><b>1985</b><br/><b>Denmark</b></p>            | <p>18 RA patients, 89% women, mean age 49 (EG) and 47 (CG) years.</p>              | <p><b>Exercise modality:</b> Cardiorespiratory</p> <p><b>Exercise period:</b> 8 weeks</p> <p><b>Duration/frequency:</b> 4-5/days a week.</p> <p><b>Description:</b> Cycling. <b>Intensity:</b> Three exercise periods for 5 minutes at a 149-161 H beats/min followed by 5 minutes at a level that allowed the pulse to decrease 10-20 beats/min.</p> <p><b>Guidance:</b> Supervised in small groups</p> <p><b>Adherence:</b> All patients followed the exercise program with near 100% compliance.</p> <p><b>Control group:</b> No intervention</p>                                                                                                                                      |
| <p><b>Daltroy et al.</b><sup>34</sup><br/><b>1995</b><br/><b>USA</b></p>                | <p>58 patients, with systemic rheumatic disease, 93% women, mean age 37 years.</p> | <p><b>Exercise modality:</b> Cardiorespiratory</p> <p><b>Exercise period:</b> 12 weeks</p> <p><b>Duration/frequency:</b> 30 min, 3/week</p> <p><b>Description:</b> On stationary bicycles. <b>Intensity:</b> 60-80% of the maximal HR.</p> <p><b>Guidance:</b> A PT instructed the patients at home the first time and visited the patient again after 2-3 weeks. All patients were contacted once a week to update exercise logs.</p> <p><b>Adherence:</b> On average 2.7 sessions of exercise (at least 20 min) per week, with only three persons exercising less than twice per week.</p> <p><b>Control group:</b> Encouraged to maintain their current level of physical activity</p> |
| <p><b>de Jong et al.</b><sup>35 38</sup><br/><b>2003</b><br/><b>The Netherlands</b></p> | <p>281 RA patients, 79% women and median age 54 (CG) and 54 (EG) years.</p>        | <p><b>Exercise modality:</b> Cardiorespiratory and strength exercises</p> <p><b>Exercise period:</b> 2 years</p> <p><b>Duration/frequency:</b> 1.25 hour 2/week</p> <p><b>Type:</b> Warm-up with stepping aside and jumping. Bicycle training for 20 minutes.</p> <p><b>Intensity:</b> 70-90% of predicted HR max. Sport or game for 20 minutes.</p> <p><b>Strength:</b> 8-10 different exercises. <b>Reps:</b> 8-15</p> <p><b>Guidance:</b> Supervised</p> <p><b>Adherence:</b> 14 patients failed to attend the exercise classes. Median 74% attendance rate. Averaged over 2 years, 30% of all participants had a sufficient attendance rate (50-</p>                                  |

75%) and 49% had a high attendance rate (75-100%).

**Control group:** Usual care.

---

|                                                                       |                                                                                         |                                                                                                                                                                                                                                                                                                                                                                                                                                                                                                                                                                                                                                                                                                                                                  |
|-----------------------------------------------------------------------|-----------------------------------------------------------------------------------------|--------------------------------------------------------------------------------------------------------------------------------------------------------------------------------------------------------------------------------------------------------------------------------------------------------------------------------------------------------------------------------------------------------------------------------------------------------------------------------------------------------------------------------------------------------------------------------------------------------------------------------------------------------------------------------------------------------------------------------------------------|
| <b>Durcan et al.</b> <sup>39</sup><br><b>2014</b><br><b>Ireland</b>   | 78 RA patients, 53% women (CG) and 75% female (EG), mean age 59 (CG) and 61 years (EG). | <b>Exercise modality:</b> Cardiorespiratory and strength exercises<br><b>Exercise period:</b> 12 week<br><b>Duration/frequency:</b> 2-3/week (strength) and 5/week (endurance).<br><b>Description:</b> <u>Strength:</u> Major muscle groups with dumbbell weight.<br><b>Intensity:</b> 40-50% of 1 RM with 15-20 reps for endurance. Some exercises 60-70% of 1 RM with 8-12 reps. <u>Cardiorespiratory:</u> 30 -60 minutes walks per day with daily step count targets and advised to be moderately short of breath on exertion.<br><b>Guidance:</b> Home exercises. Patients were assessed at baseline and every 3 weeks to adjust the program.<br><b>Adherence:</b> Not reported<br><b>Control group:</b> Advice on the benefits of exercise. |
| <b>Flint-Wagner et al.</b> <sup>40</sup><br><b>2009</b><br><b>USA</b> | 22 RA patients, 79% women, mean age 51 years.                                           | <b>Exercise modality:</b> Strength<br><b>Exercise period:</b> 16 weeks<br><b>Duration/frequency:</b> 75 minutes 3/week<br><b>Description:</b> <u>Strength:</u> Leg press, leg curl, hip abduction, calf raise, incline press, row and hammer curl. Three options for resistance, 1: Thera-Band or body weight, 2: Thera-Bands and weight machines, 3: dumbbells and weight machines (individualized). <b>Intensity:</b> 70-85% of 1RM<br><b>Reps/Sets:</b> 6-8/2-3. <b>Guidance:</b> All sessions were supervised in groups of 4.<br><b>Adherence:</b> Mean attendance was 82%.<br><b>Control group:</b> Standard care                                                                                                                           |
| <b>Häkkinen et al.</b> <sup>41</sup><br><b>1994</b><br><b>Finland</b> | 39 RA patients, 51% women, mean age 41 (EG) and 45 (CG) years.                          | <b>Exercise modality:</b> Strength<br><b>Exercise period:</b> 6 months<br><b>Duration/Frequency:</b> 2-3/week. Duration not given.<br><b>Description:</b> 9 different exercises for all major muscle groups. Special rubber bands were used for resistance. <b>Intensity:</b> 1st-2nd month: 40% of 1RM, 3rd-4th month: 50-60% of 1 RM, 5th-6th month: 70-80% of 1RM. <b>Reps/sets:</b> 1st-4th month: 15-30/2, 5th-6th month: 6-12/3                                                                                                                                                                                                                                                                                                            |

**Guidance:** Not described, but the training program was individually designed.  
**Adherence:** 2/week for 2 months, thereafter on average 2.4 times per week.  
**Control group:** Maintained their habitual physical activities, and performed no strength training at all.

---

|                                                                          |                                                 |                                                                                                                                                                                                                                                                                                                                                                                                                                                                                                                                                                                                                                                                                                                                                                                                                                                                                                                                                                                                                                |
|--------------------------------------------------------------------------|-------------------------------------------------|--------------------------------------------------------------------------------------------------------------------------------------------------------------------------------------------------------------------------------------------------------------------------------------------------------------------------------------------------------------------------------------------------------------------------------------------------------------------------------------------------------------------------------------------------------------------------------------------------------------------------------------------------------------------------------------------------------------------------------------------------------------------------------------------------------------------------------------------------------------------------------------------------------------------------------------------------------------------------------------------------------------------------------|
| <b>Häkkinen et al.</b> <sup>42,43</sup><br><b>2001</b><br><b>Finland</b> | 62 RA patients, 61% women, mean age 49 years.   | <b>Exercise modality:</b> Strength<br><b>Exercise period:</b> 2 years<br><b>Duration/frequency:</b> 45 minutes 2/week<br><b>Type:</b> <u>Strength:</u> Exercises for upper and lower extremities, abdominal and back muscles with elastic bands and dumbbells as resistance. <b>Intensity:</b> 50-70% of 1 RM. <b>Reps/sets:</b> 8-12/2<br><b>Guidance:</b> Patients were personally instructed in the strength training program, but exercised at home.<br><b>Adherence:</b> Compliance in strength exercise averaged 1.4-1.5 times/week from 0-24 months.<br><b>Control group:</b> Instructed to perform ROM and stretching exercises 2/week. They were free to participate in physical activities except strength training.                                                                                                                                                                                                                                                                                                 |
| <b>Hansen et al.</b> <sup>31</sup><br><b>1993</b><br><b>Denmark</b>      | 75 RA patients, 66% women, median age 52 years. | <b>Exercise modality:</b> Cardiorespiratory<br><b>Exercise period:</b> 2 years<br><b>Duration/frequency:</b> minimum 3/week. 30 min with aerobic training and 15 min with an overall training program. <b>Description:</b> swimming, cycling, running or jogging for 30 min daily. In addition they had an overall training program for 15 min.<br><b>Intensity:</b> Group B and C with a pulse rate of 70% of max. Group D were asked to swim or walk as fast as possible for 3 periods of 4 minutes each.<br><b>Guidance:</b> <b>A:</b> Self-training after instruction in the training program. <b>B:</b> As A plus training with a PT once a week. <b>C:</b> AS A plus weekly group training at the hospital. <b>D:</b> As C but including training in a hot water pool. <i>We combined the four groups in the meta-analysis.</i><br><b>Adherence:</b> The attendance rate to the exercise sessions was > 50% for 6/14 in group B, 6/11 in group C, and 9/13 in group D. <b>Control group:</b> No instruction in exercise. |
| <b>Harkcom et al.</b> <sup>32</sup>                                      | 17 women                                        | <b>Exercise modality:</b> Cardiorespiratory                                                                                                                                                                                                                                                                                                                                                                                                                                                                                                                                                                                                                                                                                                                                                                                                                                                                                                                                                                                    |

---

|                                                  |                                                                                   |                                                                                                                                                                                                                                                                                                                                                                                                                                                                                                                                                            |
|--------------------------------------------------|-----------------------------------------------------------------------------------|------------------------------------------------------------------------------------------------------------------------------------------------------------------------------------------------------------------------------------------------------------------------------------------------------------------------------------------------------------------------------------------------------------------------------------------------------------------------------------------------------------------------------------------------------------|
| 1985<br>USA                                      | with RA<br>mean age 52<br>years.                                                  | <b>Exercise period:</b> 12 weeks.<br><b>Duration/frequency:</b> G1: 15 min, G2: 25 min, G3: 35 min, 3/week<br><b>Description:</b> Bicycle ergometer, 5 bouts of exercise separated by a minute rest. <b>Intensity:</b> 70% of max HR. <b>Guidance:</b> Supervised by PT students. <b>Adherence:</b> Not reported.<br><b>Control group:</b> Continued their routine daily activities.                                                                                                                                                                       |
| Hsieh et al. <sup>49</sup><br>2014<br>Taiwan     | 19 patients<br>with AS, 16%<br>women,<br>mean age 36<br>(EG) and 42<br>(CG) year. | <b>Exercise modality:</b> Cardiorespiratory and strength exercises<br><b>Exercise period:</b> 3 months<br><b>Dose:</b> <u>Strength:</u> 2/week, <u>cardiorespiratory:</u> 35-45 min 3/week<br><b>Type:</b> <u>Strength:</u> Major muscle groups. <b>Intensity:</b> 60-80% of 1 RM. <b>Reps/sets:</b> 10/2.<br><u>Cardiorespiratory:</u> Aerobic exercises. <b>Intensity:</b> 50-80% of VO <sub>2</sub> peak. <b>Guidance:</b> A PT called every 2 weeks. <b>Adherence:</b> Mean compliance was 48%.<br><b>Control group:</b> ROM and stretching exercises. |
| Jennings et al. <sup>50</sup><br>2016<br>Brazil  | 70 patients<br>with AS, 30%<br>women,<br>mean age 43<br>(EG) and 40<br>(CG).      | <b>Exercise modality:</b> Cardiorespiratory exercises.<br><b>Exercise period:</b> 12 weeks<br><b>Dose:</b> 30 min 3/week<br><b>Type:</b> Walking. <b>Intensity:</b> 70% of max HR. <b>Guidance:</b> not described. <b>Adherence:</b> 82.5%<br>frequency in the 12 week program.<br><b>Control group:</b> Stretching exercises.                                                                                                                                                                                                                             |
| Karapolat et al. <sup>51</sup><br>2009<br>Turkey | 37 AS<br>patients,<br>27% women,<br>mean age 49<br>(EG) and 48<br>(CG) years.     | <b>Exercise modality:</b> Cardiorespiratory<br><b>Exercise period:</b> 6 weeks<br><b>Duration/frequency:</b> 30 min 3/week<br><b>Description:</b> Group 1: Swimming, Group 2: Walking. <i>We combined the two groups in the meta-analysis.</i> <b>Intensity:</b> 60-70% of max HR measured by Polar pulse watch. 13-15 on the Borg Scale.<br><b>Guidance:</b> Instructed prior to the start of the program, thereafter unsupervised.<br><b>Adherence:</b> Not reported.<br><b>Control group:</b> ROM exercises.                                            |
| Komatireddy et al. <sup>44</sup><br>1997<br>USA  | 42 RA<br>patients, 76%<br>women,                                                  | <b>Exercise modality:</b> Strength<br><b>Exercise period:</b> 12 weeks.<br><b>Duration/frequency:</b> 20-27 min at least 3/week                                                                                                                                                                                                                                                                                                                                                                                                                            |

|                                                                             |                                                          |                                                                                                                                                                                                                                                                                                                                                                                                                                                                                                                                                                                                                                                                               |
|-----------------------------------------------------------------------------|----------------------------------------------------------|-------------------------------------------------------------------------------------------------------------------------------------------------------------------------------------------------------------------------------------------------------------------------------------------------------------------------------------------------------------------------------------------------------------------------------------------------------------------------------------------------------------------------------------------------------------------------------------------------------------------------------------------------------------------------------|
|                                                                             | mean age 61 years.                                       | <b>Description:</b> 7 exercises for major muscle groups with ankle/wrist weights, dumbbells, and elastic bands as resistance. <b>Reps/sets:</b> 12-15/2-3 sets. <b>Intensity:</b> Moderate, 3-4 on a scale from 0-10. <b>Guidance:</b> A video tape demonstrated the exercises and accompanied the subjects through the sessions. <b>Adherence:</b> Not reported. <b>Control group:</b> Non-exercise group                                                                                                                                                                                                                                                                    |
| <b>Lemmey et al.</b> <sup>45</sup><br><b>2009</b><br><b>United Kingdom</b>  | 28 RA patients, 82% women, mean age 56 (EG) and 61 (CG). | <b>Exercise modality:</b> Strength<br><b>Exercise period:</b> 24 weeks<br><b>Duration/frequency:</b> 2/week (duration not reported).<br><b>Description:</b> Leg press, chest press, leg extension, seated rowing, leg curl, triceps extension, standing calf rises and biceps curl. <b>Intensity:</b> 80% of 1RM. <b>Reps/sets:</b> 8/3.<br><b>Guidance:</b> Supervised by an exercise physiologists.<br><b>Adherence:</b> On average 73% of the sessions<br><b>Control group:</b> ROM exercises.                                                                                                                                                                             |
| <b>Melikoglu et al.</b> <sup>46</sup><br><b>2006</b><br><b>Turkey</b>       | 36 women with RA, mean age 46 (EG) and 50 (CG).          | <b>Exercise modality:</b> Cardiorespiratory<br><b>Exercise period:</b> 2 weeks<br><b>Duration/frequency:</b> 20 min 5/week<br><b>Description:</b> On a treadmill. <b>Intensity:</b> 60% of age predicted max HR. <b>Guidance:</b> Individually supervised. <b>Adherence:</b> Not reported. <b>Control group:</b> ROM exercises                                                                                                                                                                                                                                                                                                                                                |
| <b>Miozzi et al.</b> <sup>27</sup><br><b>2012</b><br><b>Brazil</b>          | 28 women with SLE, mean age 31 years.                    | <b>Exercise modality:</b> Cardiorespiratory and strength exercises<br><b>Exercise period:</b> 12 weeks<br><b>Duration/frequency:</b> <u>Strength:</u> 35-40 min 2/week, <u>cardiorespiratory:</u> 30 min 2/week<br><b>Description:</b> 7 exercises for the main muscle groups (bench press, leg press, latissimus dorsi pull-down, leg extension, seated row, squat and sit-ups). Cardiorespiratory exercises on the treadmill. <b>Intensity:</b> <u>Strength:</u> 8-12 RM, <b>Reps/sets:</b> 8-12/4, <u>cardiorespiratory:</u> low intensity<br><b>Guidance:</b> All exercise sessions were monitored by at least 1 fitness professional.<br><b>Adherence:</b> Not reported. |
| <b>Niedermann et al.</b> <sup>28</sup><br><b>2013</b><br><b>Switzerland</b> | 106 AS patients, 40% women and                           | <b>Exercise modality:</b> Cardiorespiratory<br><b>Exercise period:</b> 12 weeks. <b>Duration/frequency:</b> 30 min 3/week<br><b>Description:</b> Nordic walking. <b>Intensity:</b> Moderate intensity, 55-75% of max HR for                                                                                                                                                                                                                                                                                                                                                                                                                                                   |

|                                                             |                                                                       |                                                                                                                                                                                                                                                                                                                                                                                                                                                                                                                                                                                                                                                                                                                                                                                                                                               |
|-------------------------------------------------------------|-----------------------------------------------------------------------|-----------------------------------------------------------------------------------------------------------------------------------------------------------------------------------------------------------------------------------------------------------------------------------------------------------------------------------------------------------------------------------------------------------------------------------------------------------------------------------------------------------------------------------------------------------------------------------------------------------------------------------------------------------------------------------------------------------------------------------------------------------------------------------------------------------------------------------------------|
|                                                             | mean age was 49 years.                                                | untrained subjects and 65-85% for trained subjects. <b>Guidance:</b> 2 PT supervised sessions per week and one home session. <b>Adherence:</b> 74.6% if the EG performed at least 3 sessions per week<br><b>Control group:</b> Standard flexibility exercises                                                                                                                                                                                                                                                                                                                                                                                                                                                                                                                                                                                 |
| <b>Sandstad et al.<sup>29</sup><br/>2015<br/>Norway</b>     | 15 women with RA or juvenile JIA, mean age 32 (EG) and 33 (CG) years. | <b>Exercise modality:</b> Cardiorespiratory<br><b>Exercise period:</b> 10 weeks<br><b>Duration/frequency:</b> 35 min, 2/week.<br><b>Description:</b> On a spinning bicycle. <b>Intensity:</b> 4 minutes at 90-95% of max HR followed by 3 minutes at 70% of max HR, repeated 4 times. Including 10 minute warm-up.<br><b>Guidance:</b> Supervised 2/week. <b>Adherence:</b> >80% of the exercise sessions.<br><b>Control group:</b> No intervention                                                                                                                                                                                                                                                                                                                                                                                           |
| <b>Sveaas/Berg et al.<sup>30</sup><br/>2014<br/>Norway</b>  | 24 axial SpA patients, 50% women, mean age 49 years.                  | <b>Exercise modality:</b> Cardiorespiratory and strength exercises<br><b>Exercise period:</b> 12 weeks<br><b>Duration/Frequency:</b> 40 min 3/week (cardiorespiratory), 20 min 2/week (strength)<br><b>Type:</b> <u>Cardiorespiratory</u> : Interval training on a treadmill. <b>Intensity:</b> 4 minutes at 90-95% of max HR followed by 3 minutes at 70% of max HR, repeated 4 times. Including 10 minute warm-up.<br><b>Strength:</b> Bench press or chest press, squat or leg press, rowing, exercises for biceps and triceps and abdominal bridge. <b>Intensity:</b> 8-10 RM <b>Reps/sets:</b> 8-10/2-3 sets.<br><b>Guidance:</b> 2 supervised session per week (PT) and one home session.<br><b>Adherence:</b> All participants included in the analysis performed ≥80% of the scheduled sessions.<br><b>Control group:</b> Usual care. |
| <b>Tech et al.<sup>33</sup><br/>2003<br/>United Kingdom</b> | 65 women with SLE, mean age 39 years.                                 | <b>Exercise modality:</b> Cardiorespiratory<br><b>Exercise period:</b> 12 weeks<br><b>Duration/frequency:</b> 30-50 min at least 3/week.<br><b>Description:</b> The main exercise was walking, but also cycling and swimming. <b>Intensity:</b> 60% pf peak VO <sub>2</sub> . <b>Guidance:</b> A supervised session every 2 weeks.<br><b>Adherence:</b> Median number of home exercise sessions was 35 and median of supervised was 5.                                                                                                                                                                                                                                                                                                                                                                                                        |

|                                                                                  |                                                          | <b>Control groups:</b> No intervention. <i>(The relaxation group is not included as a CG)</i>                                                                                                                                                                                                                                                                                                                                                                                                                                                                                                                |
|----------------------------------------------------------------------------------|----------------------------------------------------------|--------------------------------------------------------------------------------------------------------------------------------------------------------------------------------------------------------------------------------------------------------------------------------------------------------------------------------------------------------------------------------------------------------------------------------------------------------------------------------------------------------------------------------------------------------------------------------------------------------------|
| <b>Van den Ende et al.<sup>47</sup></b><br><b>1996</b><br><b>The Netherlands</b> | 50 RA patients, 62% women, mean age 52 years.            | <b>Exercise modality:</b> Cardiorespiratory<br><b>Exercise period:</b> 12 weeks<br><b>Duration/frequency:</b> 1 hour 3/ week<br><b>Description:</b> 20 min bicycling and an interval exercise program with knee bending, step ups and walking and strengthening exercises for trunk and upper extremities performed at a high pace. <b>Intensity:</b> 70-85% of age predicted HR during bicycling.<br><b>Guidance:</b> Supervised in groups.<br><b>Adherence:</b> 3 patients did not complete the program. Mean attendance rate was 75%.<br><b>Control group:</b> Written instruction for ROM home exercises |
| <b>Westby et al.<sup>48</sup></b><br><b>2000</b><br><b>Canada</b>                | 21 women with RA, mean age 56 years,                     | <b>Exercise modality:</b> Cardiorespiratory and strength exercises<br><b>Exercise period:</b> 12 months<br><b>Duration:</b> 60 min, 3/week<br><b>Description:</b> <u>Cardiorespiratory:</u> Aerobic dance. <b>Intensity:</b> 60-75% of max HR.<br><u>Strength:</u> Low load exercises using hand and cuff weights and a mat.<br><b>Guidance:</b> 3 supervised sessions, and then at home.<br><b>Adherence:</b> Mean attendance rate was 2.1/week (71%).<br><b>Control group:</b> Usual care                                                                                                                  |
| <b>Wiesing et al.<sup>53</sup></b><br><b>1998</b><br><b>Austria</b>              | 13 PM/DM patients, 9 women, age between 25 and 70 years. | <b>Exercise modality:</b> Cardiorespiratory<br><b>Exercise period:</b> 6 months<br><b>Duration/Frequency:</b> 60 min, 2/week for 2 weeks and then 3/week<br><b>Description:</b> Stationary cycling. <b>Intensity:</b> 60% of max HR. Step aerobics. <b>Intensity:</b> not described.<br><b>Guidance:</b> Supervised by PT. <b>Adherence:</b> Not reported (VO <sub>2</sub> max increased 12% )<br><b>Control group:</b> No training. Continued their usual PA level.                                                                                                                                         |

ACSM = American College of Sports Medicine; AS = ankylosing spondylitis; CG = control group; DM = dermatomyositis; EG= exercise group; PA = physical activity, PM = polymyositis; PT = physiotherapist; SLE = systemic lupus erythematosus; SpA = spondyloarthritis; RA = Rheumatoid arthritis; RCT = randomized controlled trial; ROM = range of motion; VO<sub>2</sub>max = maximal oxygen uptake; 1 RM = one repetition maximum

\* Number of patients included in the results.
