# Supplementary material
Source: HighWire-hosted journal article supplement (https://bjsm.bmj.com/content/51/14/1065)
Supplement: inline-supplementary-material-5 [file inline-supplementary-material-5.pdf]

## Supplementary Table S2 Evaluation of the quality of the evidence

The quality of the evidence evaluated according to the Grading of Recommendation, Development and Evaluation (GRADE) approach for each outcome.

| cardiorespiratory and strength exercises for inflammatory rheumatic diseases       |                                          |                                                                                                                                                 |                          |                              |                                        |          |
|------------------------------------------------------------------------------------|------------------------------------------|-------------------------------------------------------------------------------------------------------------------------------------------------|--------------------------|------------------------------|----------------------------------------|----------|
| Patient or population: patients with inflammatory rheumatic diseases               |                                          |                                                                                                                                                 |                          |                              |                                        |          |
| Settings:                                                                          |                                          |                                                                                                                                                 |                          |                              |                                        |          |
| Intervention: cardiorespiratory and strength exercise                              |                                          |                                                                                                                                                 |                          |                              |                                        |          |
| Outcomes                                                                           | Illustrative comparative risks* (95% CI) |                                                                                                                                                 | Relative effect (95% CI) | No of Participants (studies) | Quality of the evidence (GRADE)        | Comments |
|                                                                                    | Control                                  | Cardiorespiratory and strength exercise                                                                                                         |                          |                              |                                        |          |
| <b>Diagnosis Specific disease activity scores</b><br>DAS-28, BASDAI, ASDAS, SLEDAI |                                          | The mean diagnosis specific disease activity scores in the intervention groups was <b>0.19 standard deviations higher</b> (0.05 to 0.33 higher) |                          | 783 (12 studies)             | ⊕⊕⊕⊕<br><b>high</b>                    |          |
| <b>Erythrocyte sedimentation rate</b><br>Blood sample                              |                                          | The mean erythrocyte sedimentation rate in the intervention groups was <b>0.20 standard deviations higher</b> (0 to 0.39 higher)                |                          | 450 (12 studies)             | ⊕⊕⊕⊖<br><b>moderate</b> <sup>1</sup>   |          |
| <b>C-reactive protein</b>                                                          |                                          | The mean c-reactive protein in the intervention groups was <b>0.14 standard deviations lower</b> (0.37 lower to 0.08 higher)                    |                          | 307 (8 studies)              | ⊕⊕⊕⊖<br><b>moderate</b> <sup>2</sup>   |          |
| <b>Creatine Phosphokinase</b>                                                      |                                          | The mean creatine phosphokinase in the intervention groups was <b>1.31 standard deviations higher</b> (0.2 lower to 2.82 higher)                |                          | 26 (2 studies)               | ⊕⊕⊕⊖<br><b>low</b> <sup>3,4</sup>      |          |
| <b>Radiographic damage</b>                                                         |                                          | The mean radiographic damage in the intervention groups was <b>0.27 standard deviations higher</b> (0.07 to 0.46 higher)                        |                          | 438 (4 studies)              | ⊕⊕⊕⊖<br><b>moderate</b> <sup>5</sup>   |          |
| <b>Pain</b>                                                                        |                                          | The mean pain in the intervention groups was <b>0.30 standard deviations higher</b> (0.13 to 0.47 higher)                                       |                          | 598 (12 studies)             | ⊕⊕⊕⊖<br><b>moderate</b> <sup>6</sup>   |          |
| <b>Fatigue</b><br>NRS                                                              |                                          | The mean fatigue in the intervention groups was <b>0.36 standard deviations higher</b> (0.17 to 0.54 higher)                                    |                          | 483 (9 studies)              | ⊕⊕⊕⊖<br><b>moderate</b> <sup>7</sup>   |          |
| <b>Stiffness</b>                                                                   |                                          | The mean stiffness in the intervention groups was <b>0.47 standard deviations higher</b> (0.26 to 0.68 higher)                                  |                          | 406 (7 studies)              | ⊕⊕⊕⊖<br><b>moderate</b> <sup>8,9</sup> |          |
| <b>Number of swollen joints</b>                                                    |                                          | The mean number of swollen joints in the intervention groups was <b>0.35 standard deviations higher</b> (0.03 to 0.67 higher)                   |                          | 184 (5 studies)              | ⊕⊕⊕⊖<br><b>low</b> <sup>10,11</sup>    |          |
| <b>Joint tenderness</b>                                                            |                                          | The mean joint tenderness in the intervention groups was <b>0.19 standard deviations higher</b> (0.1 lower to 0.48 higher)                      |                          | 187 (4 studies)              | ⊕⊕⊕⊖<br><b>low</b> <sup>12,13</sup>    |          |

\*The basis for the **assumed risk** (e.g. the median control group risk across studies) is provided in footnotes. The **corresponding risk** (and its 95% confidence interval) is based on the assumed risk in the comparison group and the **relative effect** of the intervention (and its 95% CI).

CI: Confidence interval.

GRADE Working Group grades of evidence

**High quality:** Further research is very unlikely to change our confidence in the estimate of effect.

**Moderate quality:** Further research is likely to have an important impact on our confidence in the estimate of effect and may change the estimate.

**Low quality:** Further research is very likely to have an important impact on our confidence in the estimate of effect and is likely to change the estimate.

**Very low quality:** We are very uncertain about the estimate.

<sup>1</sup> The confidence interval goes from 0.01 to 0.44. The total number of patients is 361.

<sup>2</sup> Small sample size (N=212). CI from -0.19 to 0.35.

<sup>3</sup> I-Square = 62%. Large difference between study effect sizes.

<sup>4</sup> Small sample size. Effect size from small negative to large positive.

<sup>5</sup> CI goes from almost zero to a medium sized effect.

<sup>6</sup> 8 of 11 studies are unclear regarding concealment of allocation.

<sup>7</sup> Four of nine studies are rated with high risk of bias regarding blinding. Four of nine studies are unclear regarding concealment of allocation.

<sup>8</sup> 6 of 7 studies unclear allocation concealment. Only 2 have low risk of bias regarding selective reporting.

<sup>9</sup> CI from 0.26 to 0.68.

<sup>10</sup> All studies unclear on allocation concealment. 3 of unclear on generation of allocation sequence.

<sup>11</sup> N=184. CI from 0.03 to 0.70.

<sup>12</sup> All studies have unclear risk of bias on allocation concealment and selective reporting. 3 of 4 have unclear generation of allocation sequence.

<sup>13</sup> N=187. CI from -0.10 to 0.48.
